# Supplementary material for: SUMOylation by SUMO2 is implicated in the degradation of misfolded ataxin-7 via RNF4 in SCA7 models
Source: PubMed Central journal article supplement (PMC6361149; doi:10.1242/dmm.036145), 2019-01-11
Supplement: dmm-12-036145-s1.pdf [file dmm-12-036145-s1.pdf]

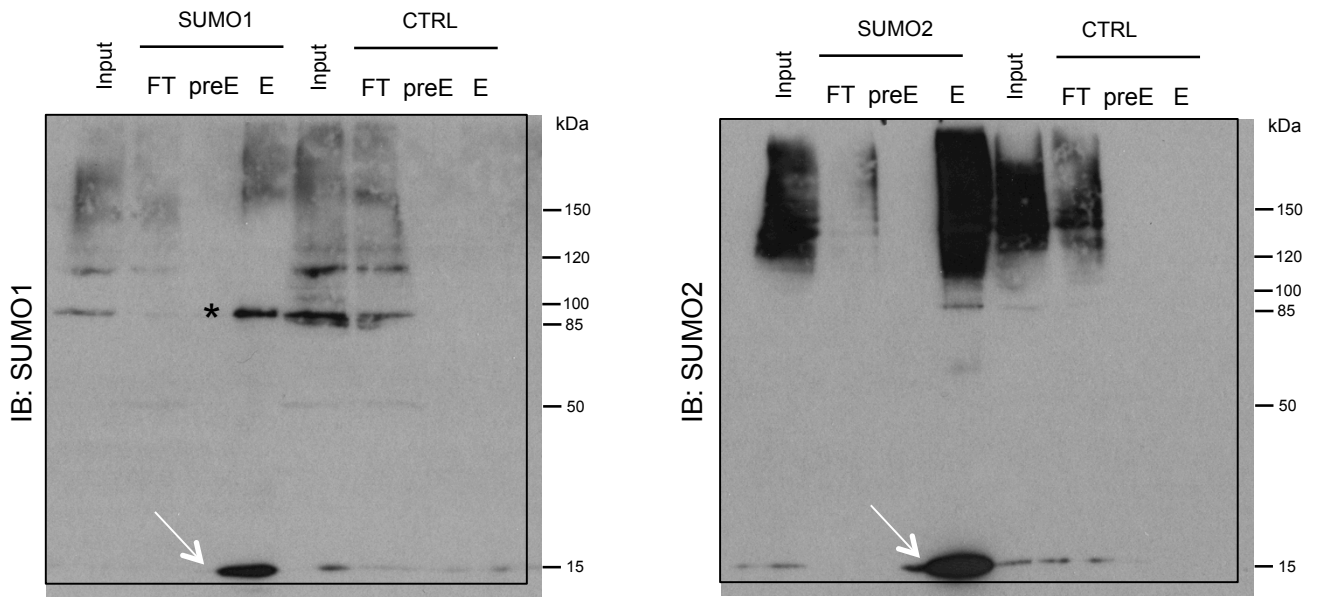

**Figure S1. ATXN7 SUMOylation by SUMO-immunoprecipitation : Controls for SUMO1 and SUMO2 IP**

A) MCF7 cell lysate was subjected to denaturing immunoprecipitations with beads coupled to monoclonal antibodies against SUMO1, SUMO2 or IgG (control) (see Fig.1A). IP efficiency in controls shown on immunoblots revealed with anti-SUMO1 and anti-SUMO2 antibodies: eluted free SUMO1 and SUMO2 are indicated by white arrows. FT, flow-through; preE, pre-elution wash; E, eluate. \*SUMOylated RanGAP1.

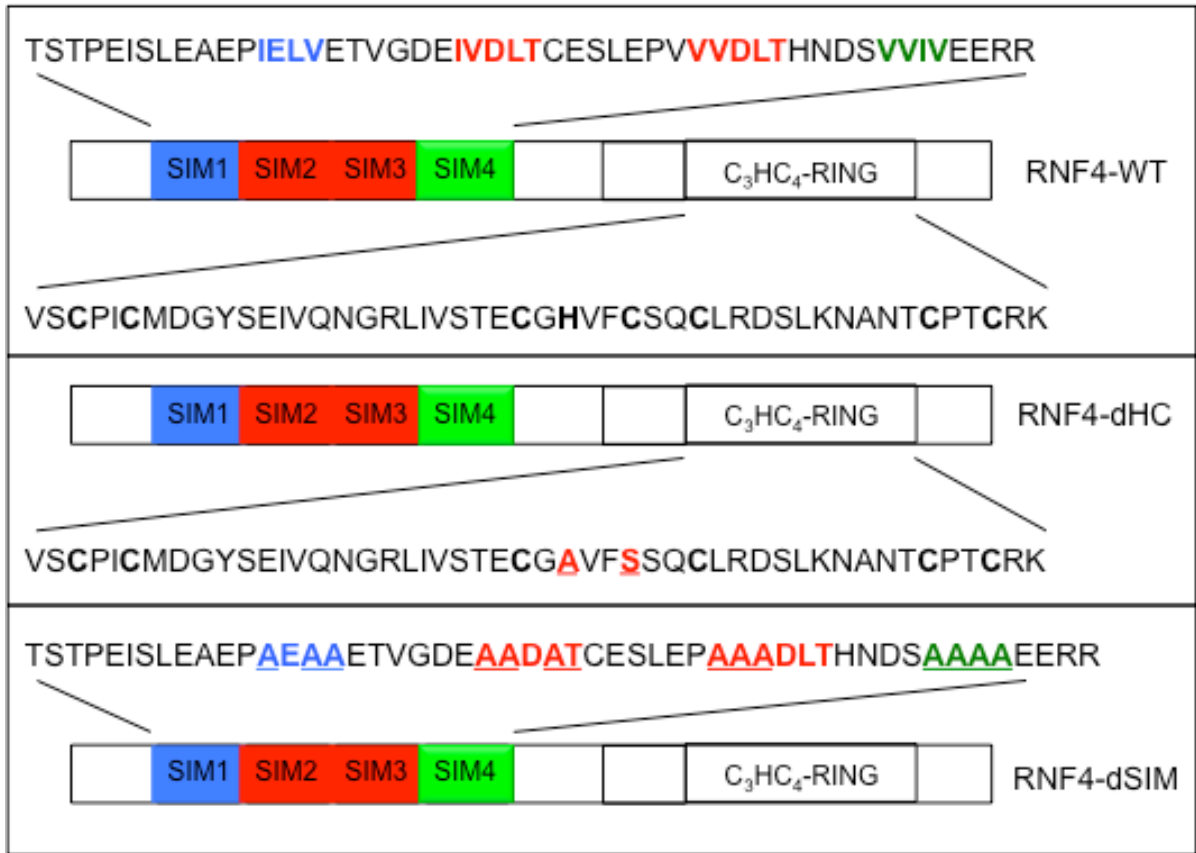

**Figure S2. Schematic representation of RNF4 WT and the RNF4 mutants dHC and dSIM**  
 SIM domains are indicated, the mutations are underlined. The RING and the mutations are underlined.

**Table S1. Primary antibodies used in western blot (WB), immunofluorescence (IF), immunohistochemical (IHC) and immunoprecipitation (IP) analyses.**

| Primary Antibodies             | Species | Source                | Catalog number | WB     | IHC    | IF     | IP                   |
|--------------------------------|---------|-----------------------|----------------|--------|--------|--------|----------------------|
| Ataxin-7                       | Mouse   | Yvert et al., 2001    | 1C1            |        |        | 1:1000 |                      |
| Ataxin-7                       | Rabbit  | Thermo Scientific     | PA1-749        | 1:2000 | 1:1000 | 1:1000 | 2,5 ug/mg of protein |
| FLAG tag                       | Mouse   | Sigma                 | M2 F3165       | 1:500  |        |        |                      |
| HA tag                         | Mouse   | Covance               | MMS-101P       | 1:2000 |        |        |                      |
| PML H-238                      | Rabbit  | Santa Cruz            | Sc-5621        | 1:2000 |        | 1:1000 |                      |
| PML clone 36.1                 | Mouse   | Millipore             | MAB3738        | 1:2000 |        |        |                      |
| PML                            | Chicken | Lallemant et al. 2008 |                |        |        | 1:2000 |                      |
| RanGAP1                        | Goat    | Barysch et al., 2014  |                | 1:2000 |        |        |                      |
| RNF4                           | Rabbit  | Hakli et al., 2005    |                | 1:1000 | 1:200  | 1:500  |                      |
| SUMO-1                         | Rabbit  | Abcam                 | ab11672        | 1:2000 | 1:500  | 1:500  |                      |
| SUMO-1 21C7 (coupled-beads)    | Mouse   | Barysch et al., 2014  | 21C7           |        |        |        | 10 ul/mg of protein  |
| SUMO-2 8A2 (coupled-beads)     | Mouse   | Barysch et al., 2014  | 8A2            |        |        |        | 10 ul/mg of protein  |
| SUMO-2 clone 8A2               | Mouse   | Barysch et al., 2014  | 8A2            | 1:1000 | 1:250  | 1:500  |                      |
| SUMO-2/3                       | Rabbit  | Abcam                 | ab3742         | 1:2000 | 1:500  | 1:500  |                      |
| Ubiquitin                      | Mouse   | Santa Cruz            | Sc-8017        | 1:2000 |        |        |                      |
| Multiubiquitin Chain clone FK2 | Mouse   | Biomol                | Cay14220       | 1:5000 |        | 1:500  |                      |
| $\alpha$ -Tubulin              | Rabbit  | Abcam                 | ab4074         | 1:2000 |        |        |                      |

Table S2. Primer sequences.

| qRT-PCR Primers | Sequence                         |
|-----------------|----------------------------------|
| <b>Pias1-F</b>  | 5'-GTCTCCTACGTCACCACTAAG-3'      |
| <b>Pias1-R</b>  | 5'-GCATAGGCGTCATGTGGAAG-3'       |
| <b>Pias2-F</b>  | 5'-CCGTGCAGTGACTTGTACAC-3'       |
| <b>Pias2-R</b>  | 5'-CTCATCCACATCAGAACAGTC-3'      |
| <b>Pias3-F</b>  | 5'-GGTGAGGCAATTGACTGCAG-3'       |
| <b>Pias3-R</b>  | 5'-GTAGTAGCCACTTCACTGTCTG-3'     |
| <b>Pias4-F</b>  | 5'-GACGCTAGTGGCCAAGATGG-3'       |
| <b>Pias4-R</b>  | 5'-GTCACCAGTTCGTGCTTCAG-3'       |
| <b>Senp1-F</b>  | 5'-GCTGACTGACAGTGAAGACG-3'       |
| <b>Senp1-R</b>  | 5'-GAGTCTGAATGTCTTTGCGTG-3'      |
| <b>Senp2-F</b>  | 5'-GAAGGTGCTCATGGAAGCACG-3'      |
| <b>Senp2-R</b>  | 5'-CTGACGCCATGATTCTGCTC-3'       |
| <b>Senp3-F</b>  | 5'-CAGGCAACGCTATGGTAAGG-3'       |
| <b>Senp3-R</b>  | 5'-CTGTGTCCATGACCAGATCTC-3'      |
| <b>Senp6-F</b>  | 5'-CCTCCTTATGGACTCACTCAG-3'      |
| <b>Senp6-R</b>  | 5'-CTACATACTGCAGCACATAGAC-3'     |
| <b>Sumo1-F</b>  | 5'-GTGAATCCACGTCACCATGTC-3'      |
| <b>Sumo1-R</b>  | 5'-GTATCTCACTGCTATCCTGTC-3'      |
| <b>Sumo2-F</b>  | 5'-GTCAATGAGGCAGATCAGATTC-3'     |
| <b>Sumo2-R</b>  | 5'-CACATCAATCGTATCTTCATCC-3'     |
| <b>Rplp0-F</b>  | 5'-GGCTGATCCATCTGCATTTGCG-3'     |
| <b>Rplp0-R</b>  | 5'-ATCTGATTCCTCCGACTCTTCCTTTG-3' |
| <b>B2m-F</b>    | 5'-GTCGTGCTTGCCATTCAGA-3'        |
| <b>B2m-R</b>    | 5'-CATGTCTCGATCCCAGTAGACGGT-3'   |
